# Supplementary material for: Clotrimazole-Loaded Mediterranean Essential Oils NLC: A Synergic Treatment of Candida Skin Infections
Source: MDPI journal article supplement (doi:10.3390/pharmaceutics11050231), 2019-05-13
Supplement: s1 [file s1]

**Supplementary Table 1.** Mean particle size (Zave, nm) and polydispersity index (PDI)  $\pm$  standard deviation (S.D.) of unloaded and clotrimazole (CLZ) loaded NLC prepared using *Lavandula* (L) and *Rosmarinus* (R) essential oil and analyzed after 2 and 6 months of storage at 25 °C. Each value is the average of six different experiments.

| Time Storage | Samples  | Zave (nm) $\pm$ S.D. | PDI $\pm$ S.D.    |
|--------------|----------|----------------------|-------------------|
| 2 months     | LNLC     | 88.0 $\pm$ 2.2       | 0.095 $\pm$ 0.006 |
|              | RNLC     | 77.6 $\pm$ 1.1       | 0.140 $\pm$ 0.023 |
|              | CLZ-LNLC | 159.7 $\pm$ 2.7      | 0.120 $\pm$ 0.003 |
|              | CLZ-RNLC | 137.2 $\pm$ 1.9      | 0.094 $\pm$ 0.010 |
| 6 months     | LNLC     | 102.0 $\pm$ 1.5      | 0.114 $\pm$ 0.010 |
|              | RNLC     | 87.6 $\pm$ 4.9       | 0.140 $\pm$ 0.014 |
|              | CLZ-LNLC | 162.0 $\pm$ 1.4      | 0.176 $\pm$ 0.016 |
|              | CLZ-RNLC | 139.6 $\pm$ 4.0      | 0.153 $\pm$ 0.031 |

**Supplementary Table 2.** Thermotropic parameters of mesophase transition from gel ( $L\beta$ ) to liquid crystalline phase ( $L\alpha$ ) of multilamellar vesicle dispersions made up of DMPC at different dilutions.

| Sample | T <sub>m</sub> °C | $\Delta H$ (Jg)   |
|--------|-------------------|-------------------|
| MLV    | 25.18 $\pm$ 0.02  | -48.32 $\pm$ 0.20 |
| C1     | 24.89 $\pm$ 0.05  | -44.46 $\pm$ 0.31 |
| C2     | 24.68 $\pm$ 0.07  | -28.61 $\pm$ 0.26 |
| C3     | 25.22 $\pm$ 0.03  | -20.13 $\pm$ 0.23 |
