# Supplementary material for: Clotrimazole-Loaded Mediterranean Essential Oils NLC: A Synergic Treatment of Candida Skin Infections
Source: MDPI journal article supplement (doi:10.3390/pharmaceutics11050231), 2019-05-13

a)

**Z-Average (d.nm): 85.91**  
**Pdl: 0.107**  
 Intercept: 0.953  
 Result quality **Good**

|         | Size (d.nm...) | % Intensity: | St Dev (d.n...) |
|---------|----------------|--------------|-----------------|
| Peak 1: | 95.96          | 100.0        | 32.31           |
| Peak 2: | 0.000          | 0.0          | 0.000           |
| Peak 3: | 0.000          | 0.0          | 0.000           |

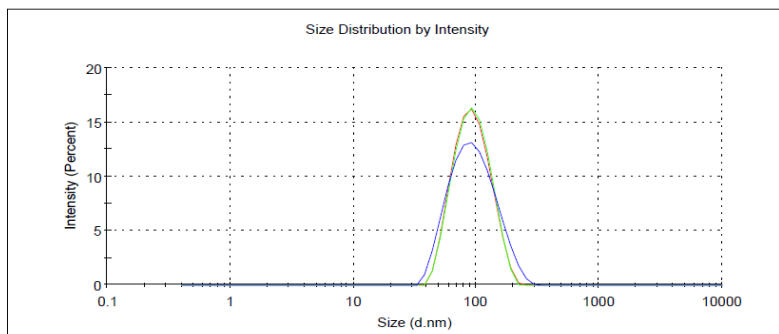

b)

**Z-Average (d.nm): 76.41**  
**Pdl: 0.104**  
 Intercept: 0.964  
 Result quality **Good**

|         | Size (d.nm...) | % Intensity: | St Dev (d.n...) |
|---------|----------------|--------------|-----------------|
| Peak 1: | 86.14          | 100.0        | 30.73           |
| Peak 2: | 0.000          | 0.0          | 0.000           |
| Peak 3: | 0.000          | 0.0          | 0.000           |

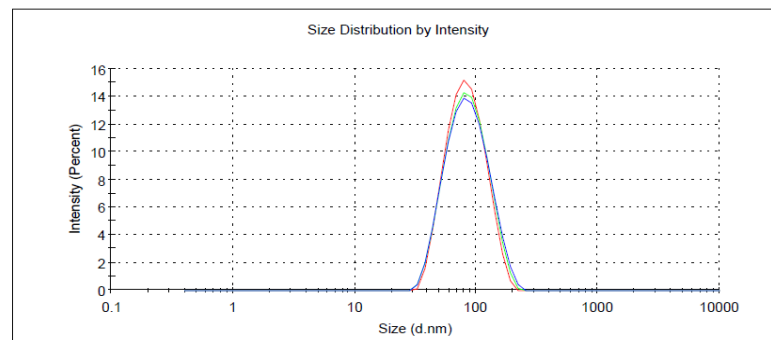

c)

**Z-Average (d.nm): 163.8**  
**Pdl: 0.101**  
 Intercept: 0.970  
 Result quality **Good**

|         | Size (d.nm...) | % Intensity: | St Dev (d.n...) |
|---------|----------------|--------------|-----------------|
| Peak 1: | 184.4          | 100.0        | 62.03           |
| Peak 2: | 0.000          | 0.0          | 0.000           |
| Peak 3: | 0.000          | 0.0          | 0.000           |

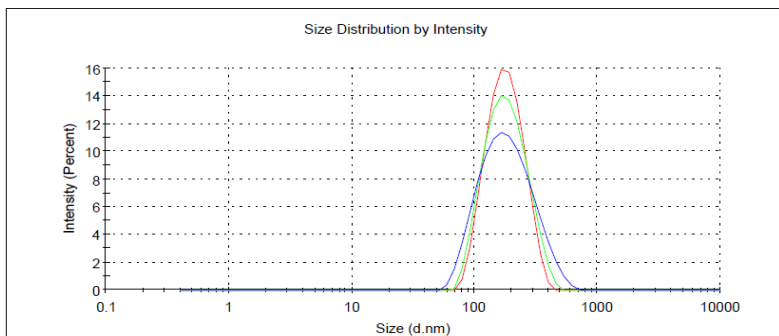

d)

**Z-Average (d.nm): 125.4**  
**Pdl: 0.175**  
 Intercept: 0.951  
 Result quality **Good**

|         | Size (d.nm...) | % Intensity: | St Dev (d.n...) |
|---------|----------------|--------------|-----------------|
| Peak 1: | 148.5          | 100.0        | 67.85           |
| Peak 2: | 0.000          | 0.0          | 0.000           |
| Peak 3: | 0.000          | 0.0          | 0.000           |

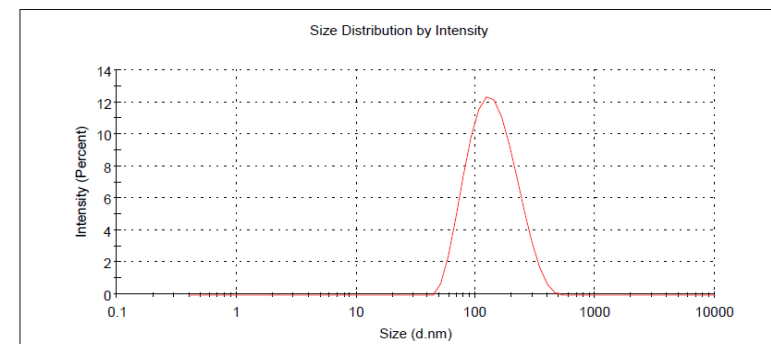

Supplement: s1 [file s1]
