# Supplementary figures and images for: Clotrimazole-Loaded Mediterranean Essential Oils NLC: A Synergic Treatment of Candida Skin Infections
Source: MDPI journal article supplement (doi:10.3390/pharmaceutics11050231), 2019-05-13

exo

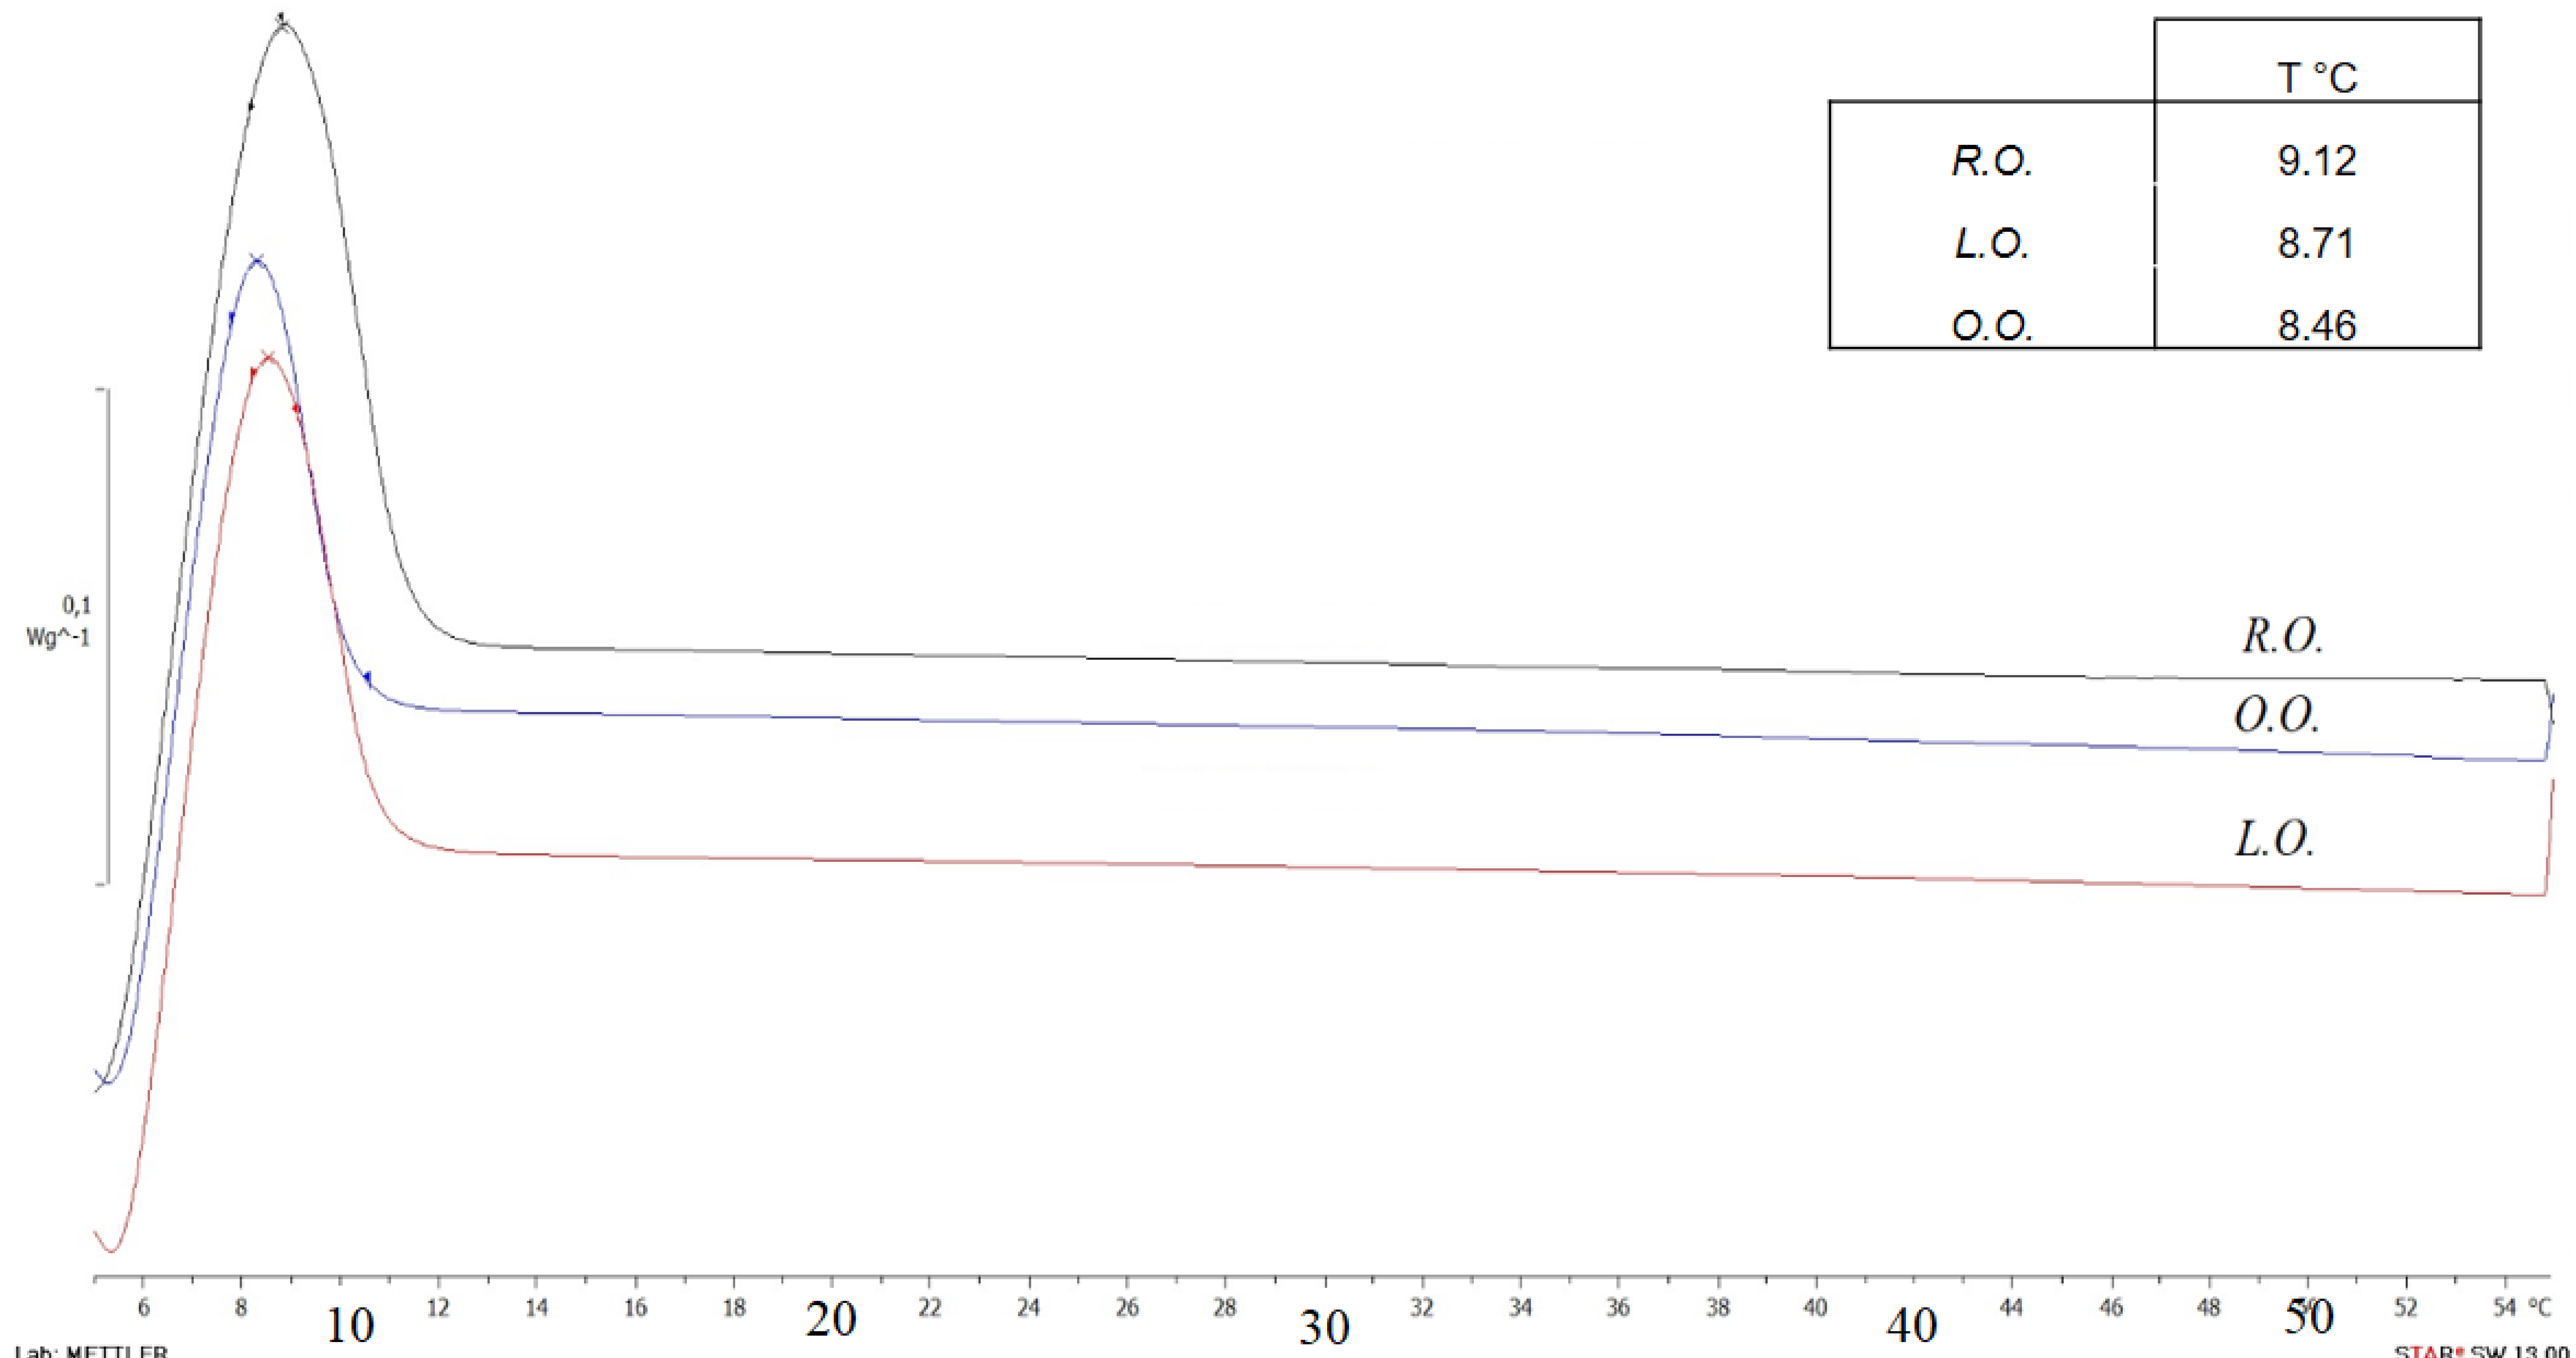

|             | T °C |
|-------------|------|
| <i>R.O.</i> | 9.12 |
| <i>L.O.</i> | 8.71 |
| <i>O.O.</i> | 8.46 |

Supplement: s1 [file s1]
